# Supplementary material
Source: PubMed Central journal article supplement (PMC8225238)
Supplement: NIHMS1700029-supplement-Acin-Perez-Suppl__Figure.pdf [file NIHMS1700029-supplement-Acin-Perez-Suppl__Figure.pdf]

---

**Supplementary information**

---

**Fgr kinase is required for proinflammatory  
macrophage activation during diet-  
induced obesity**

---

In the format provided by the  
authors and unedited

**a**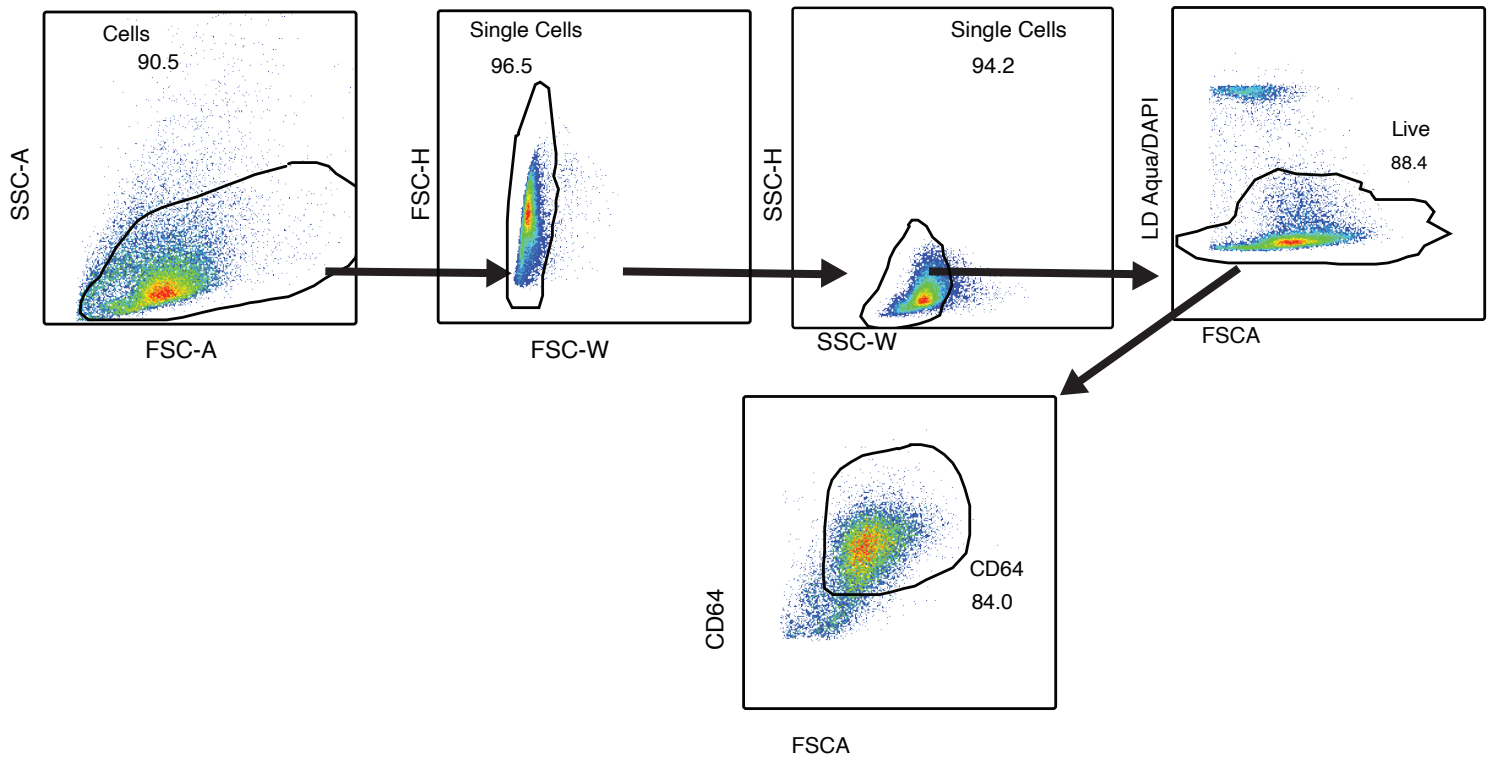**b**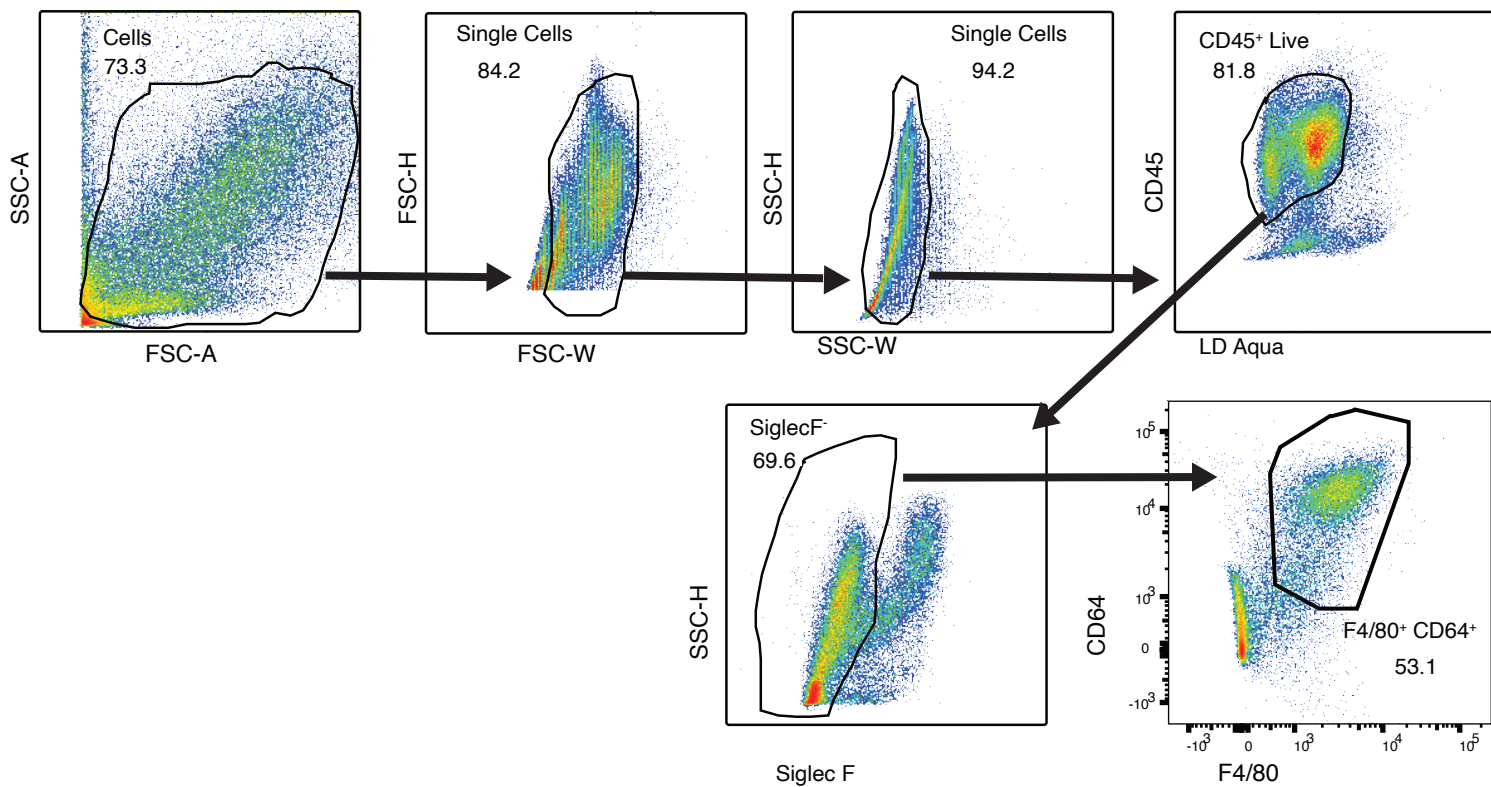

**Supplementary figure 1.- Gating strategy to identify: (a) Bone-marrow derived macrophages (BMDM) and (b) WAT macrophages by flow cytometry.** FSC vs SSC gating was used to identify cells in BMDM cultures, related to Fig. 1a-c, 2a-b (a) or adipose tissue, related to Fig. 6a-e and Extended Data Fig. 6 (b). Singlets were selected through FSC-H vs. FSC-W and SSC-H vs. SSC-W. Dead cells were excluded through DAPI or LIVE/DEAD Fixable Aqua Dead Cell Stain Kit, for 405 nm excitation. (a) BMDM are identified as CD64+. (b) Hematopoietic cells were first selected by CD45 expression, then Macrophages were identified as Siglec F-, F4/80+ and CD64+. Boundaries among different populations were established based on beads, isotype controls for each fluorophore and/or Fluorescence Minus One (FMO) control.
